# Supplementary material for: Higher Risk of Recurrence in Patients Treated for Head and Neck Cancer with Low BMI and Elevated Levels of C-Reactive Protein
Source: MDPI journal article supplement (doi:10.3390/cancers14205161), 2022-10-21
Supplement: s1 [file s1]

Supplementary Table S1. Treatment groups.

| <b>Treatment</b>                                       | <b>N</b> |
|--------------------------------------------------------|----------|
| Surgery only                                           | 30       |
| Radiotherapy only                                      | 90       |
| Preoperative radiotherapy + surgery                    | 6        |
| Surgery+ postoperative radiotherapy                    | 54       |
| Chemoradiation only                                    | 61       |
| Preoperative chemoradiation+ surgery                   | 3        |
| Surgery + postoperative chemoradiation                 | 11       |
| Radiotherapy + cetuximab only                          | 15       |
| Surgery + postoperative radiotherapy + cetuximab       | 1        |
| Preoperative radiotherapy + cetuximab + postop surgery | 1        |
